# Supplementary material
Source: Springer Nature journal article supplement (https://www.springermedizin.de/resource/supplementary/13054_2009_8274_MOESM1_ESM.pdf/9731602)

a)

**Eicosapentaenoic Acid in Plasma PC**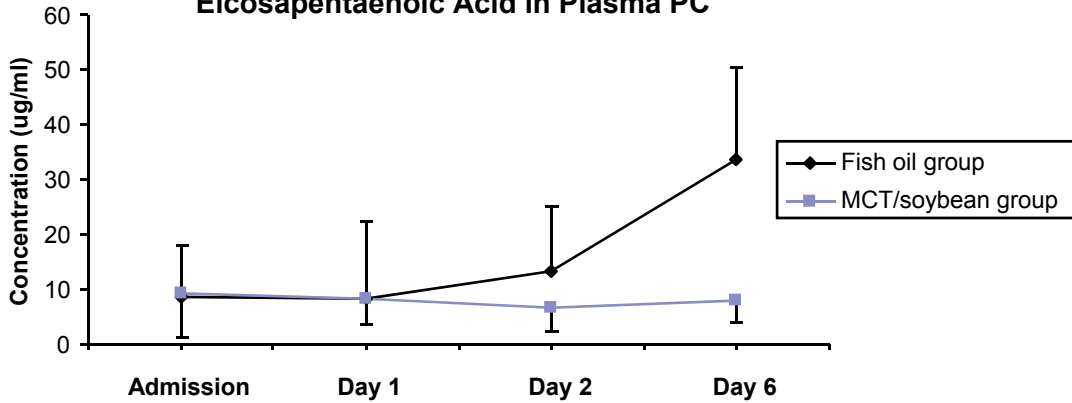

b)

**Docosahexaenoic Acid in Plasma PC**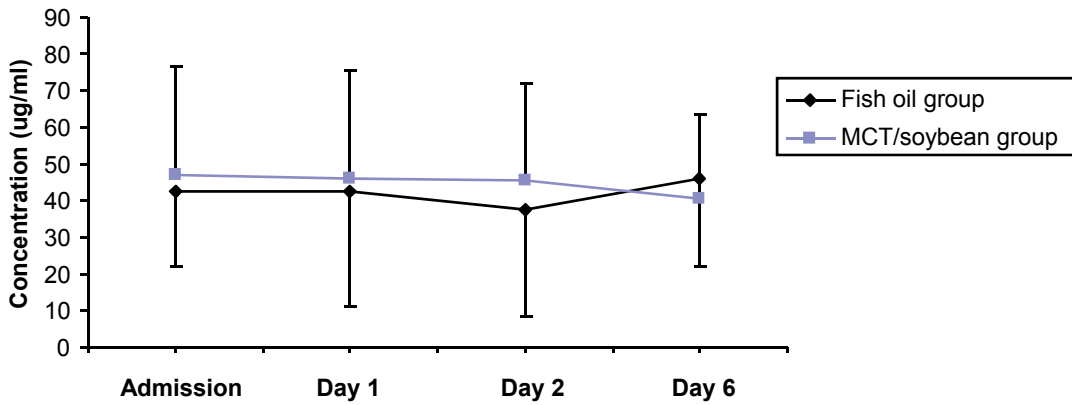

c)

**Arachidonic Acid in Plasma PC**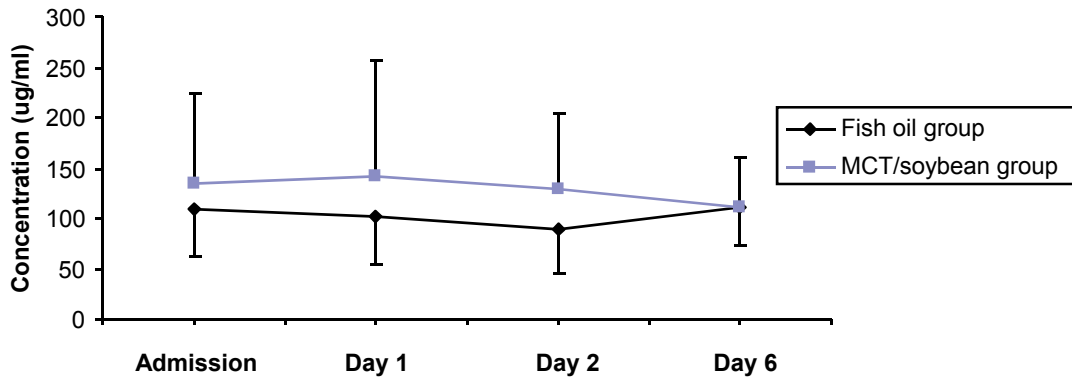

Supplement: MOESM1 [file 9731602]
